# Supplementary material for: Screening structure–property correlations and device performance of Ir(iii) complexes in multi-layer PhOLEDs
Source: Royal Society of Chemistry journal article supplement (doi:10.1039/c1dt11059d), 2011-01-01
Supplement: c1dt11059d.pdf [file c1dt11059d.pdf]

## Electronic Supplementary Information

For

Screening structure-property-correlations and device performance of Ir(III) complexes in multi-layer PhOLEDs

Nan Tian,<sup>a,c</sup> Daniel Lenkeit,<sup>a</sup> Simon Pelz,<sup>a</sup> Dimitrios Kourkoulos,<sup>b</sup> Dirk Hertel,<sup>b</sup> Klaus Meerholz\*<sup>b</sup> and Elisabeth Holder\*<sup>a,c</sup>

<sup>a</sup> *Functional Polymers Group and Institute of Polymer Technology, University of Wuppertal, Gaußstr. 20, D-42097 Wuppertal, Germany. Fax: +49-202-439-3880; Tel: +49-202-439-3879; E-mail: [holder@uni-wuppertal.de](mailto:holder@uni-wuppertal.de)*

<sup>b</sup> *Institute of Physical Chemistry, University of Cologne, Luxemburgerstr. 116, D-50939 Cologne, Germany. Fax: +49-221-470-5144; Tel: +49-221-470-3275; E-mail: [klaus.meerholz@uni-koeln.de](mailto:klaus.meerholz@uni-koeln.de)*

<sup>c</sup> *Dutch Polymer Institute (DPI), P.O. Box 513, NL-5600 AX Eindhoven, The Netherlands.*

Contents:

|                                                                                                 |   |
|-------------------------------------------------------------------------------------------------|---|
| <b>Fig S1</b> Typical current <i>versus</i> voltage curves for the screened devices.            | 2 |
| <b>Fig S2</b> Typical brightness <i>versus</i> current density curves for the screened devices. | 2 |
| <b>Fig S3</b> Typical efficiency <i>versus</i> current density curves for the screened devices. | 3 |

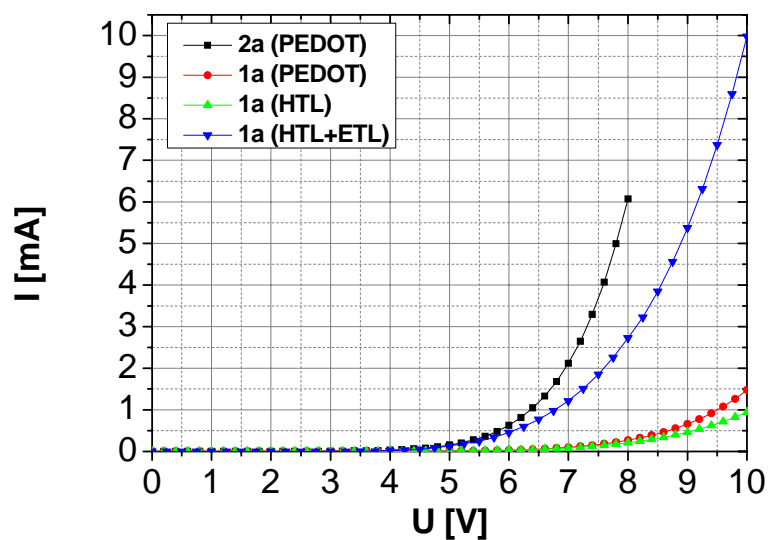

Fig S1 Typical current *versus* voltage curves for the screened devices.

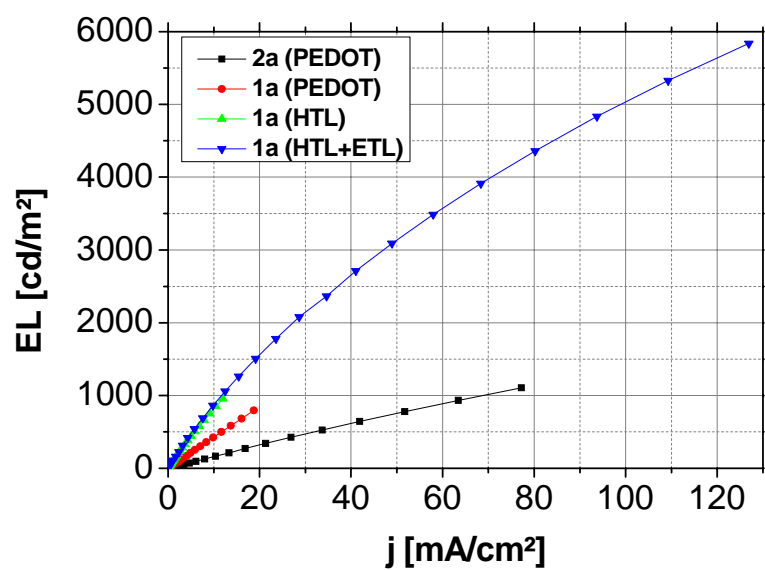

Fig S2 Typical brightness *versus* current density curves for the screened devices.

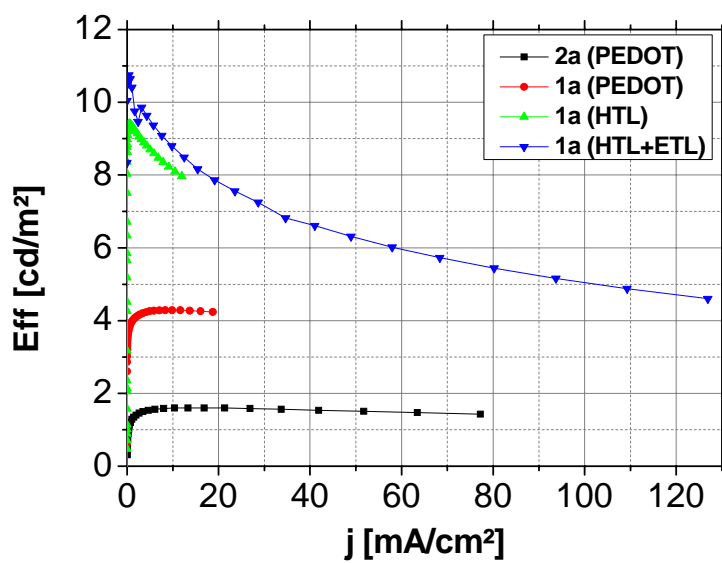

**Fig S3** Typical efficiency *versus* current density curves for the screened devices.
